# Supplementary material
Source: publisher site journal article supplement (https://www.dovepress.com/article/307247)
Supplement: Supplementary file 1 [file get_supplementary_file.php]

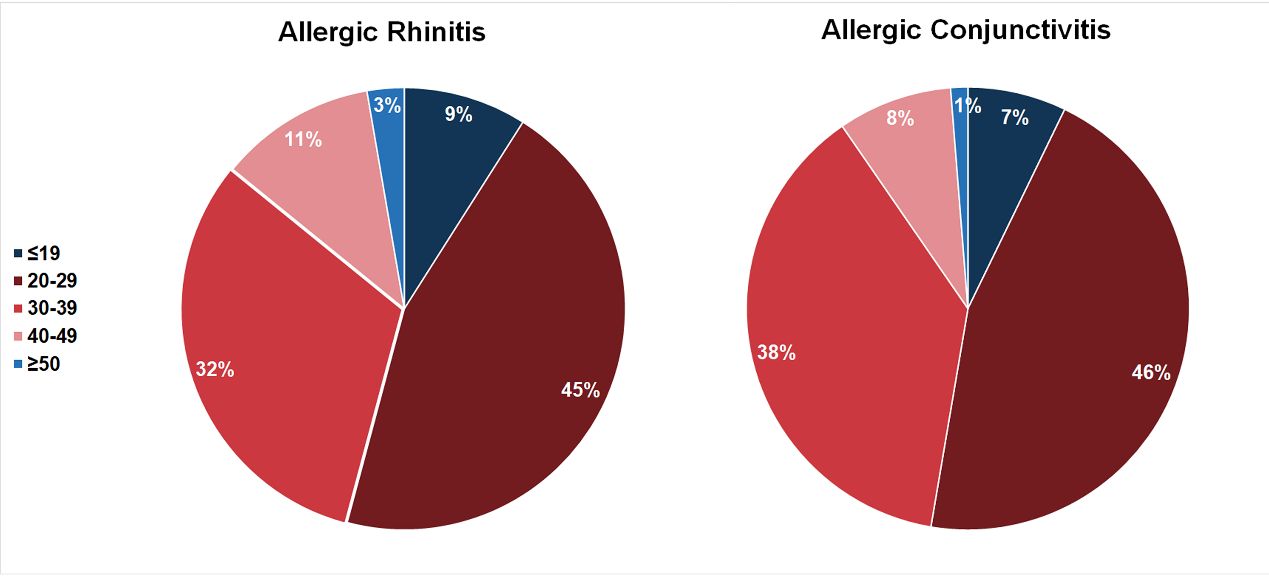


Figure S1: Proportion of the aged 20-49 who using Baidu search engine to search for “allergic rhinitis” and “allergic conjunctivitis” in mandarin.
